# Supplementary material for: Synergistic Sensitization of High-Grade Serous Ovarian Cancer Cells Lacking Caspase-8 Expression to Chemotherapeutics Using Combinations of Small-Molecule BRD4 and CDK9 Inhibitors
Source: MDPI journal article supplement (doi:10.3390/cancers16010107), 2023-12-24
Supplement: s1 [file s1]

a

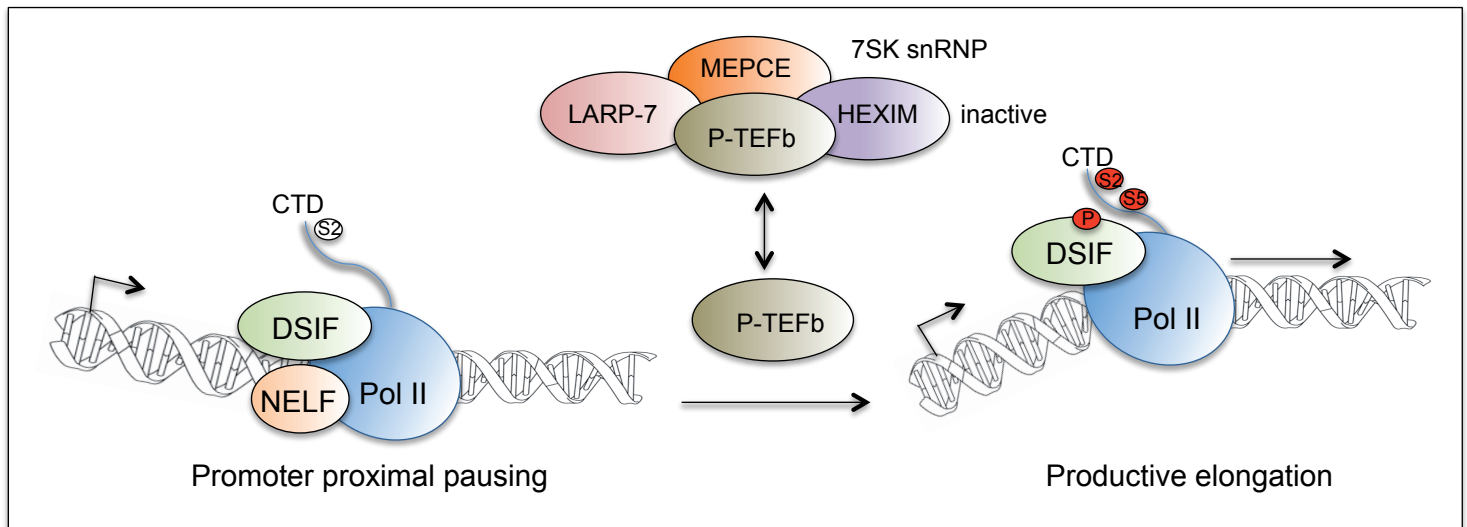

b

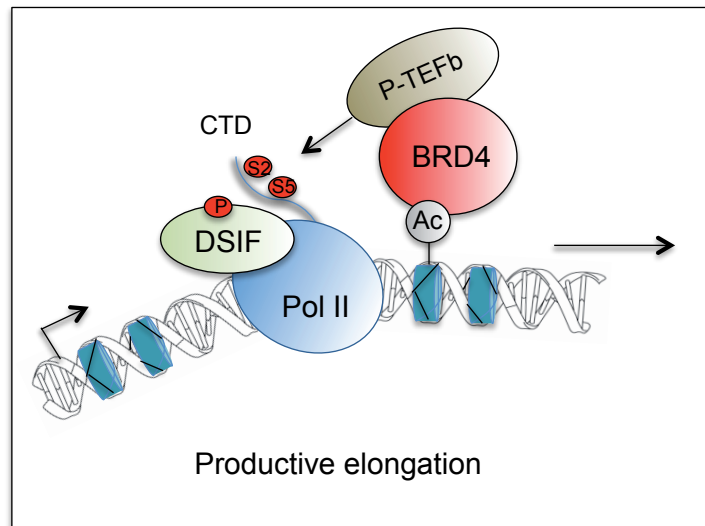

Supplementary Figure S1

**a**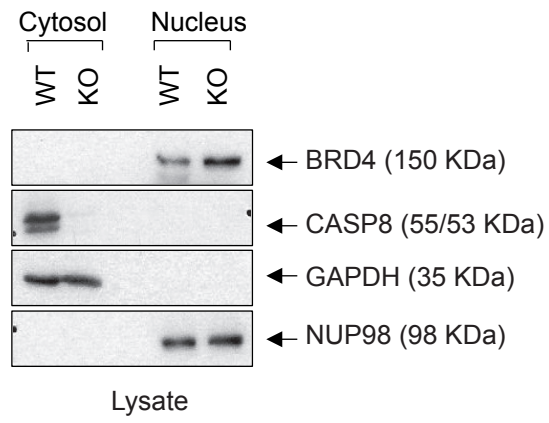**b**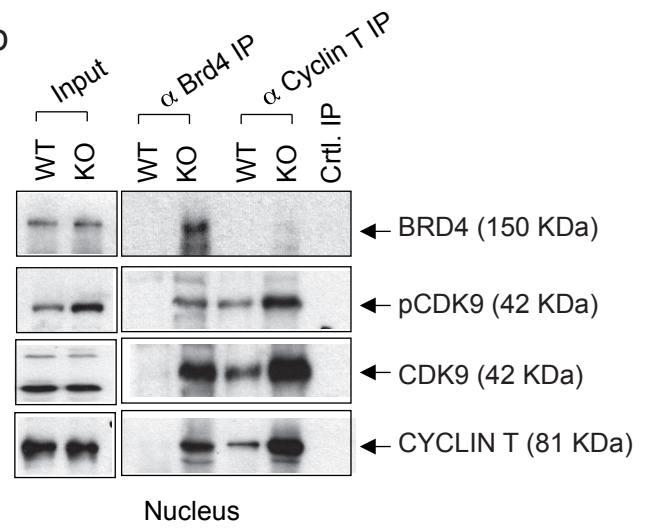

Supplementary Figure S2

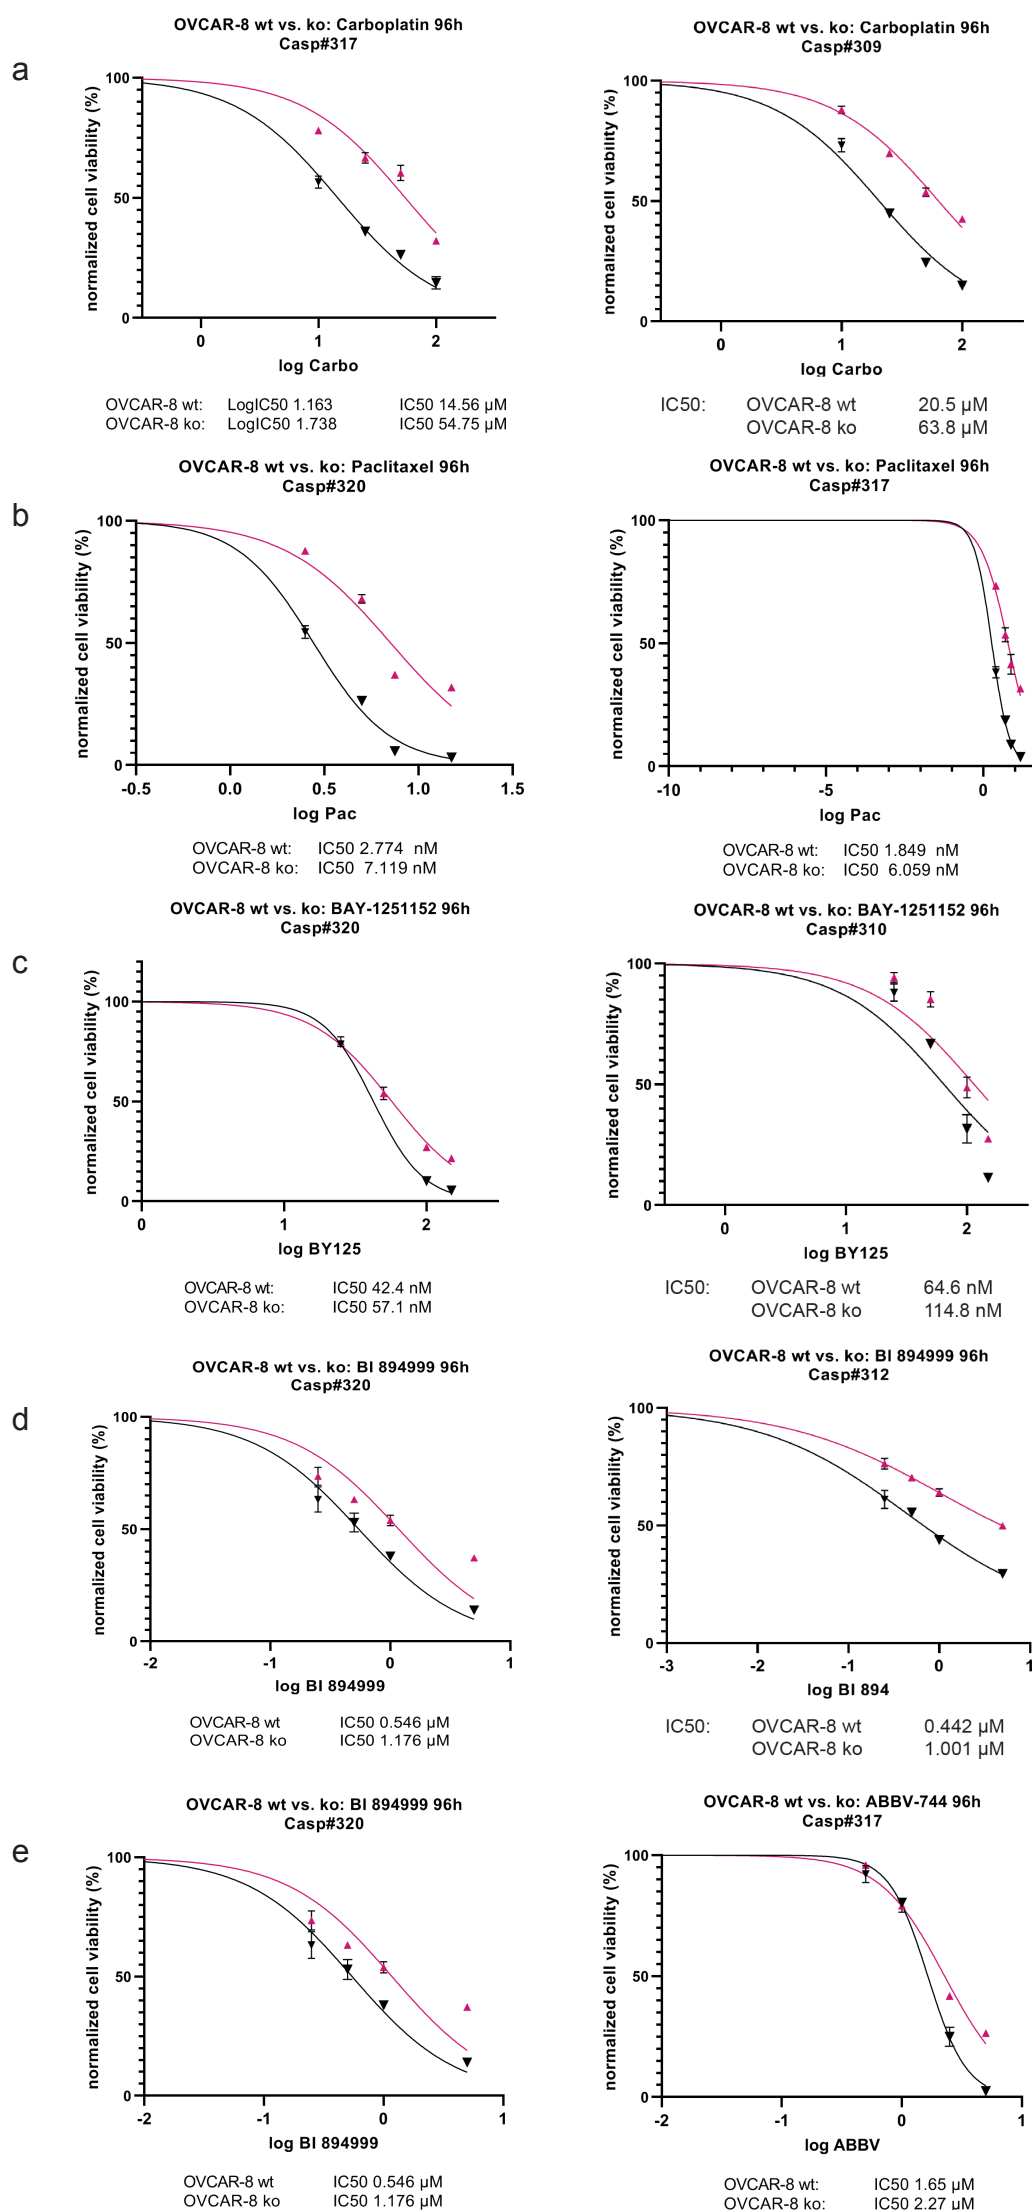

**a** Single

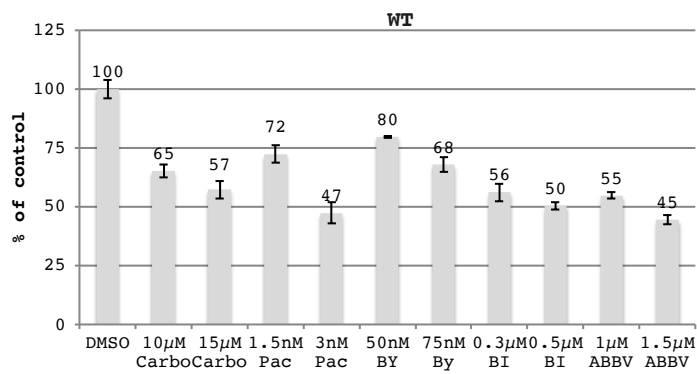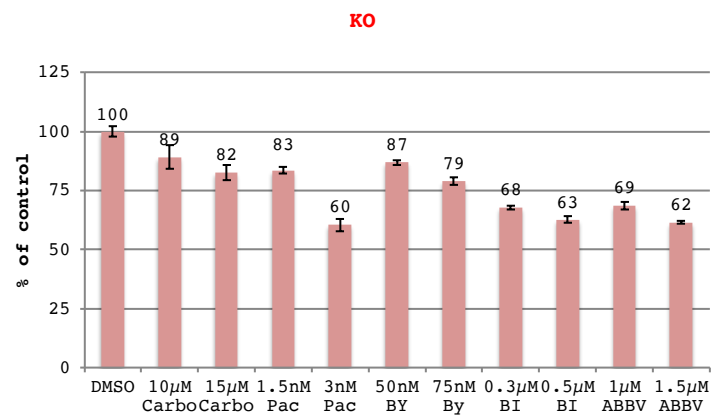

**b** Carbo + BRD4i

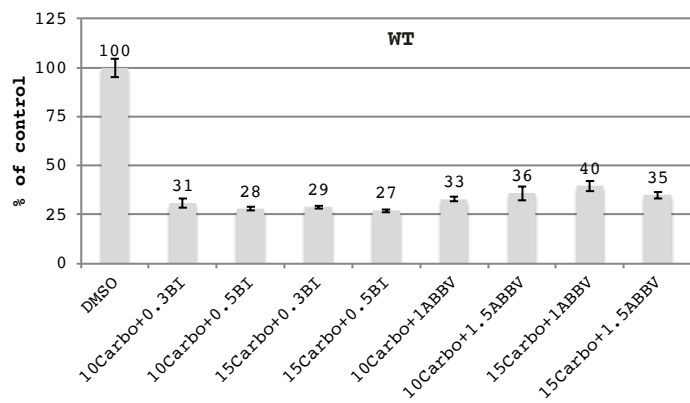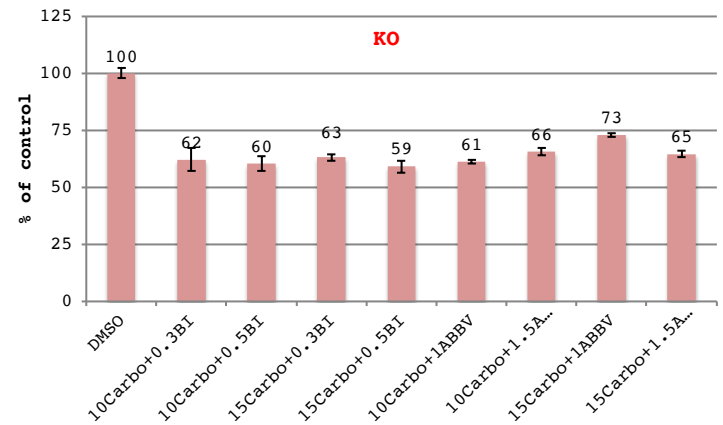

**c** Paclitaxel+ BRD4i

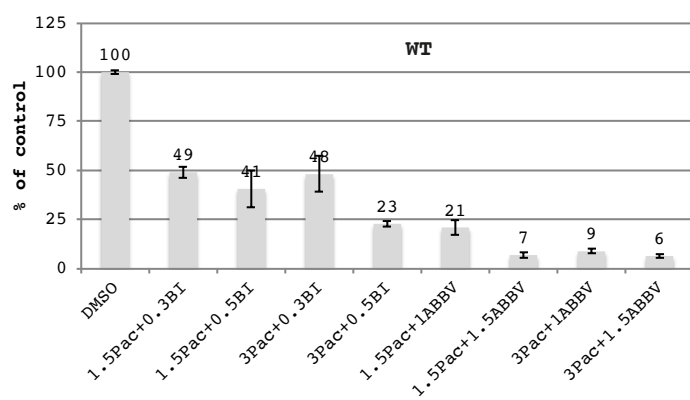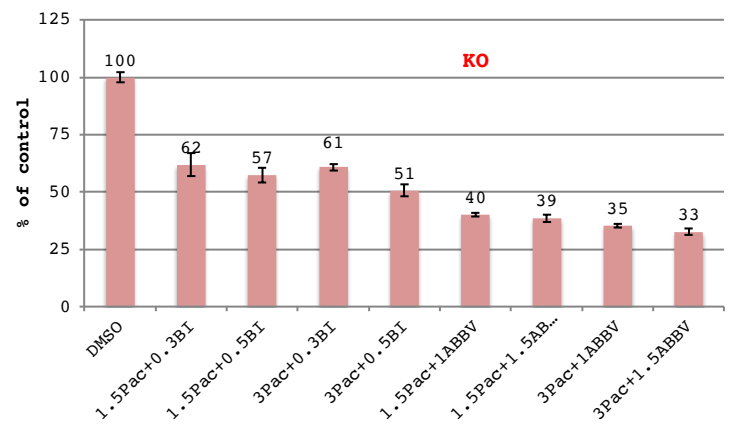

**d** CDK9i + BRD4i

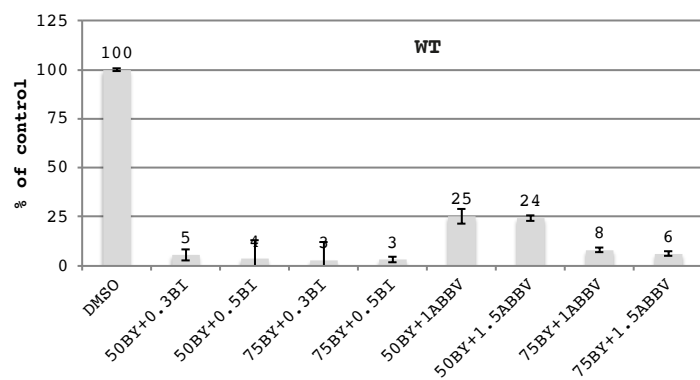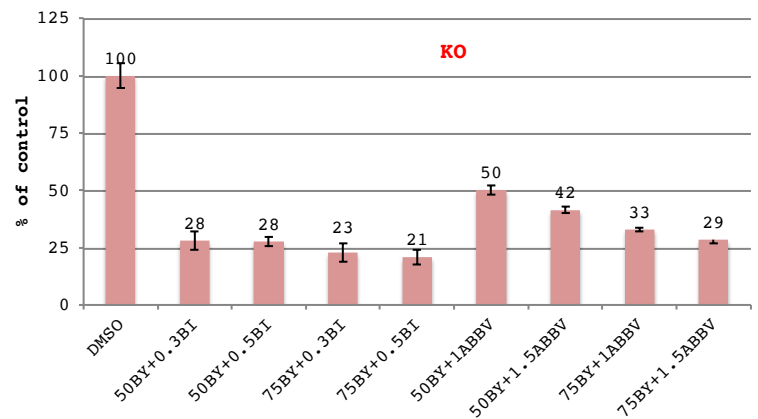

# Single

a

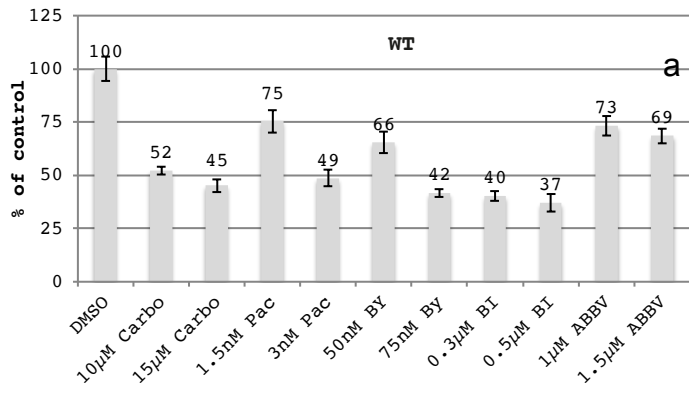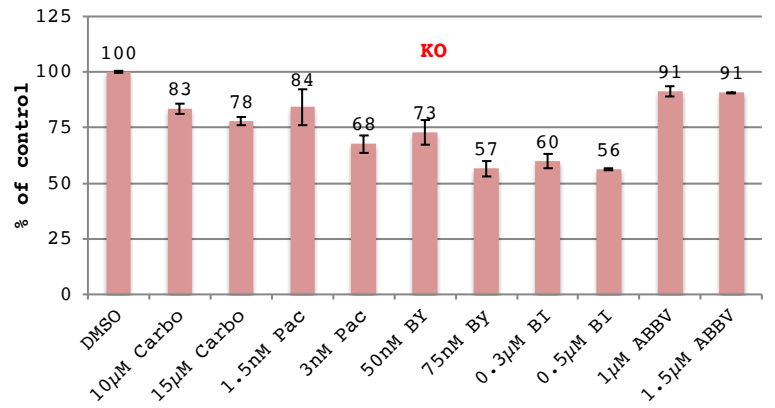

b

Carbo + BRD4i

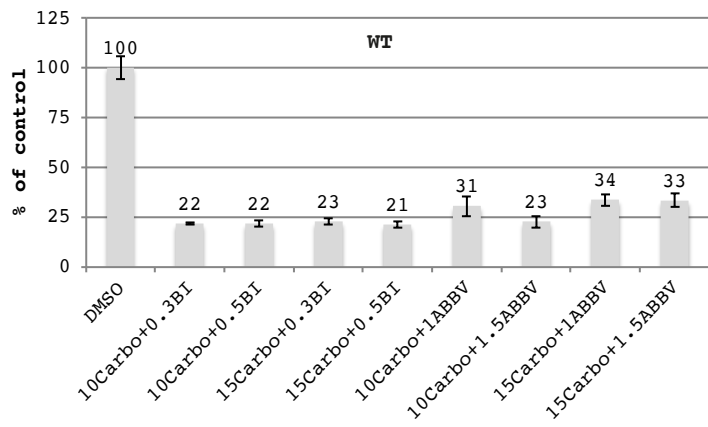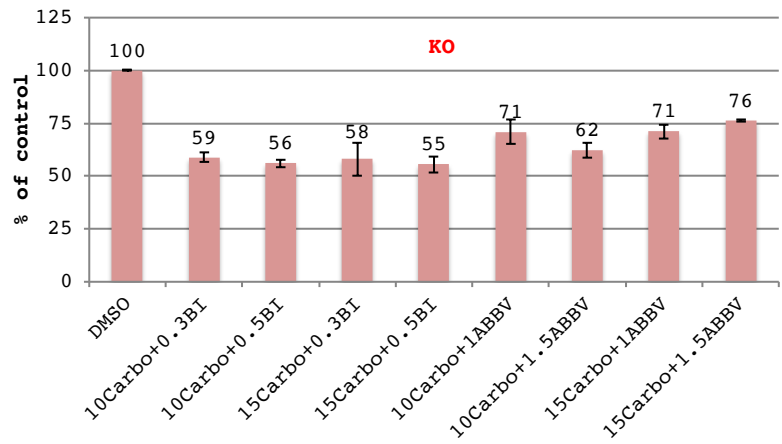

c

Paclitaxel+ BRD4i

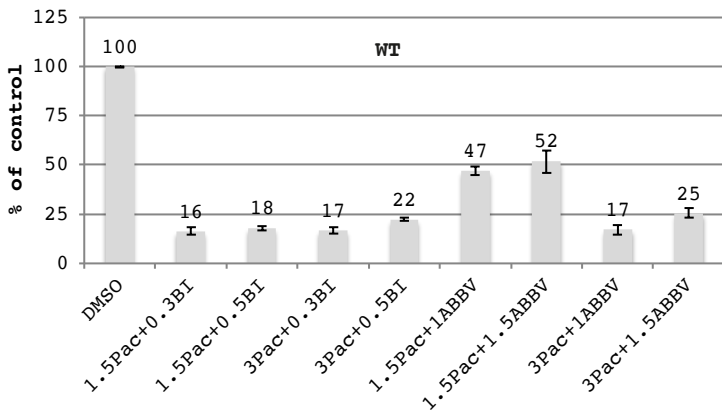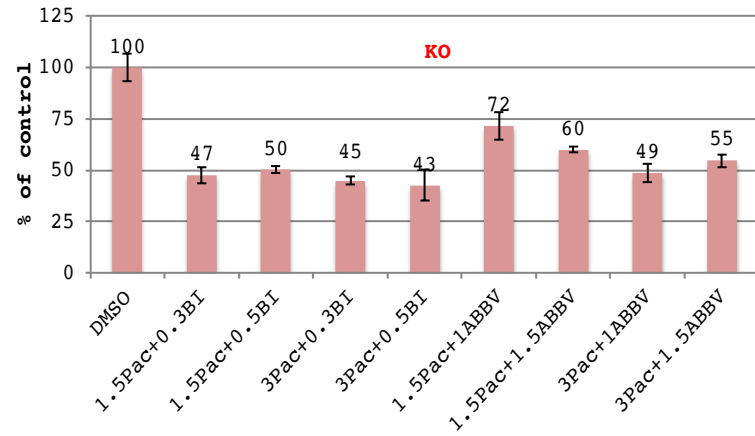

d

CDK9i + BRD4i

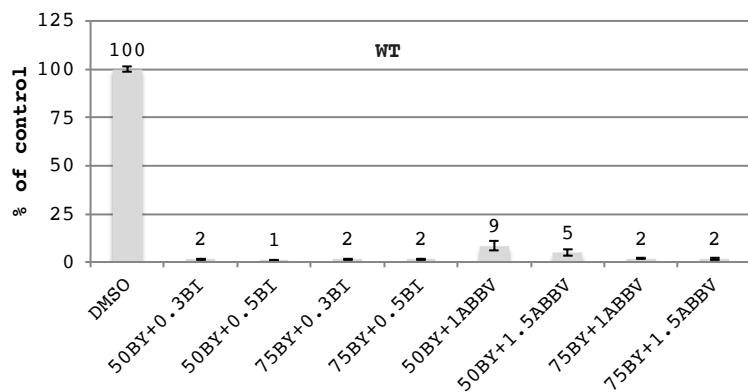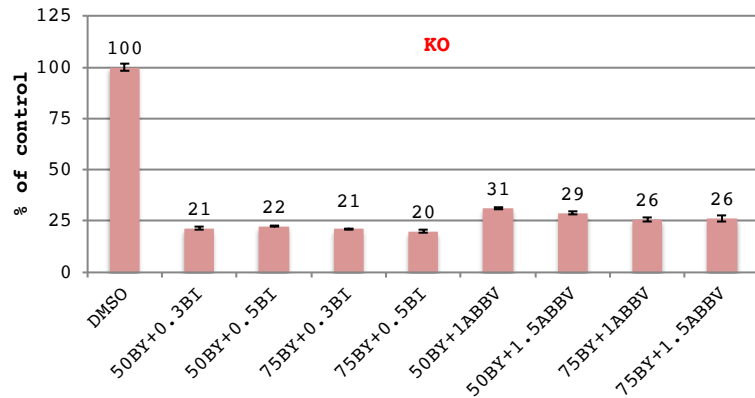

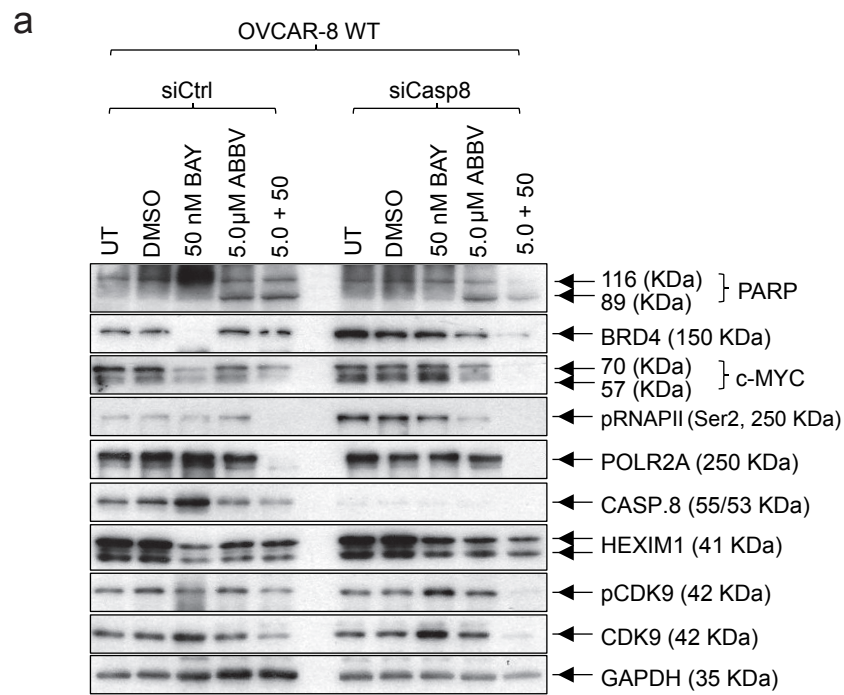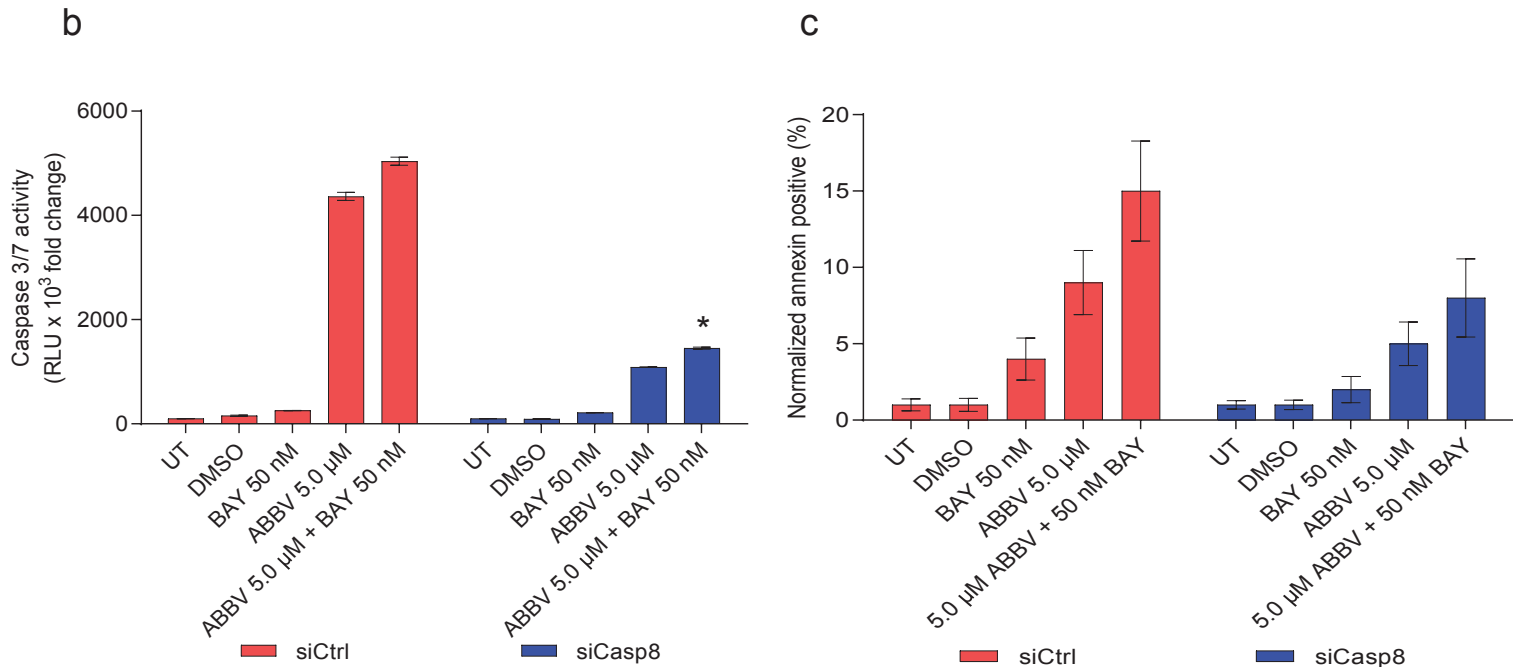

\* = combi. siCtrl vs. combi. siCasp8

Supplementary Figure S6
