# Supplementary figures and images for: Synergistic Sensitization of High-Grade Serous Ovarian Cancer Cells Lacking Caspase-8 Expression to Chemotherapeutics Using Combinations of Small-Molecule BRD4 and CDK9 Inhibitors
Source: MDPI journal article supplement (doi:10.3390/cancers16010107), 2023-12-24

# Unropped Figures

a

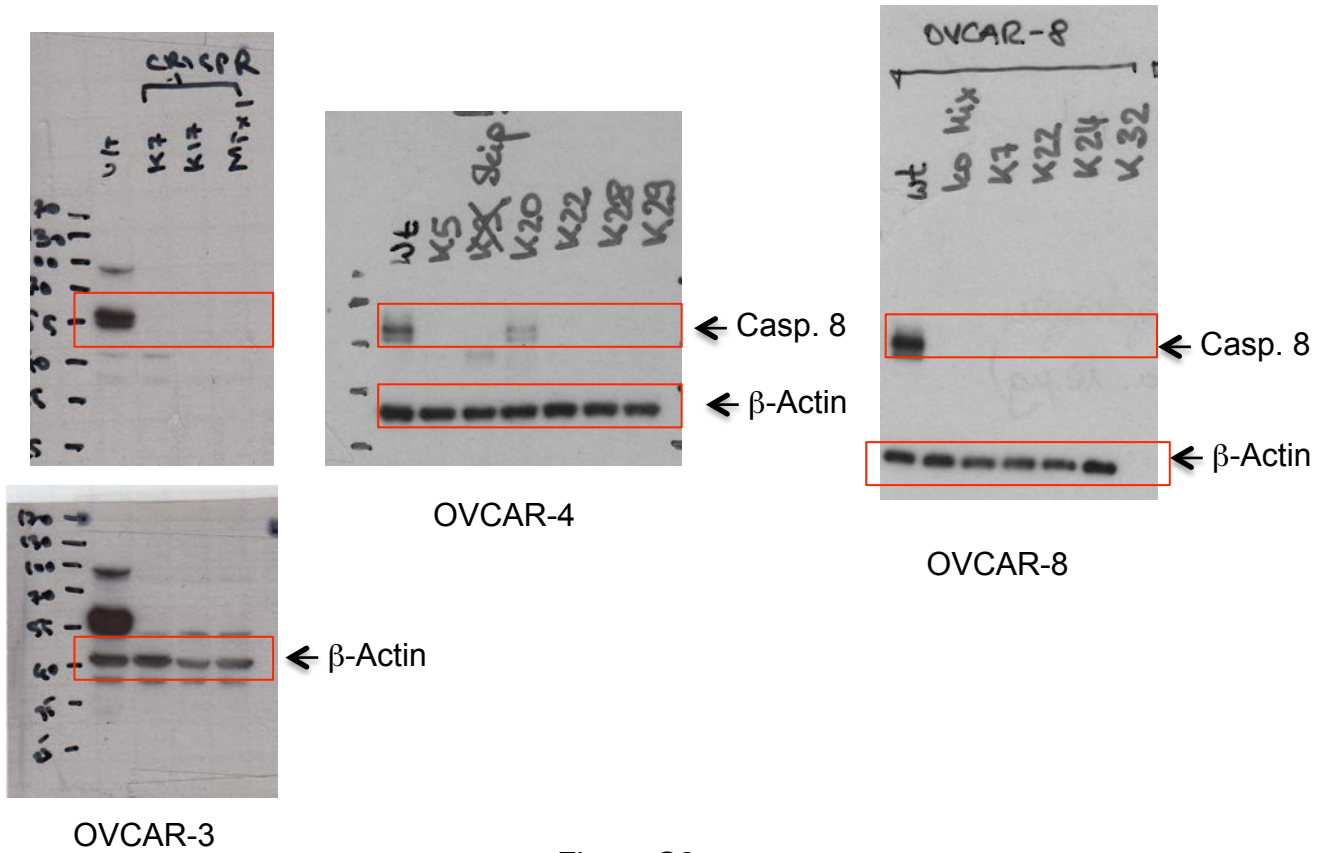

Figure S2

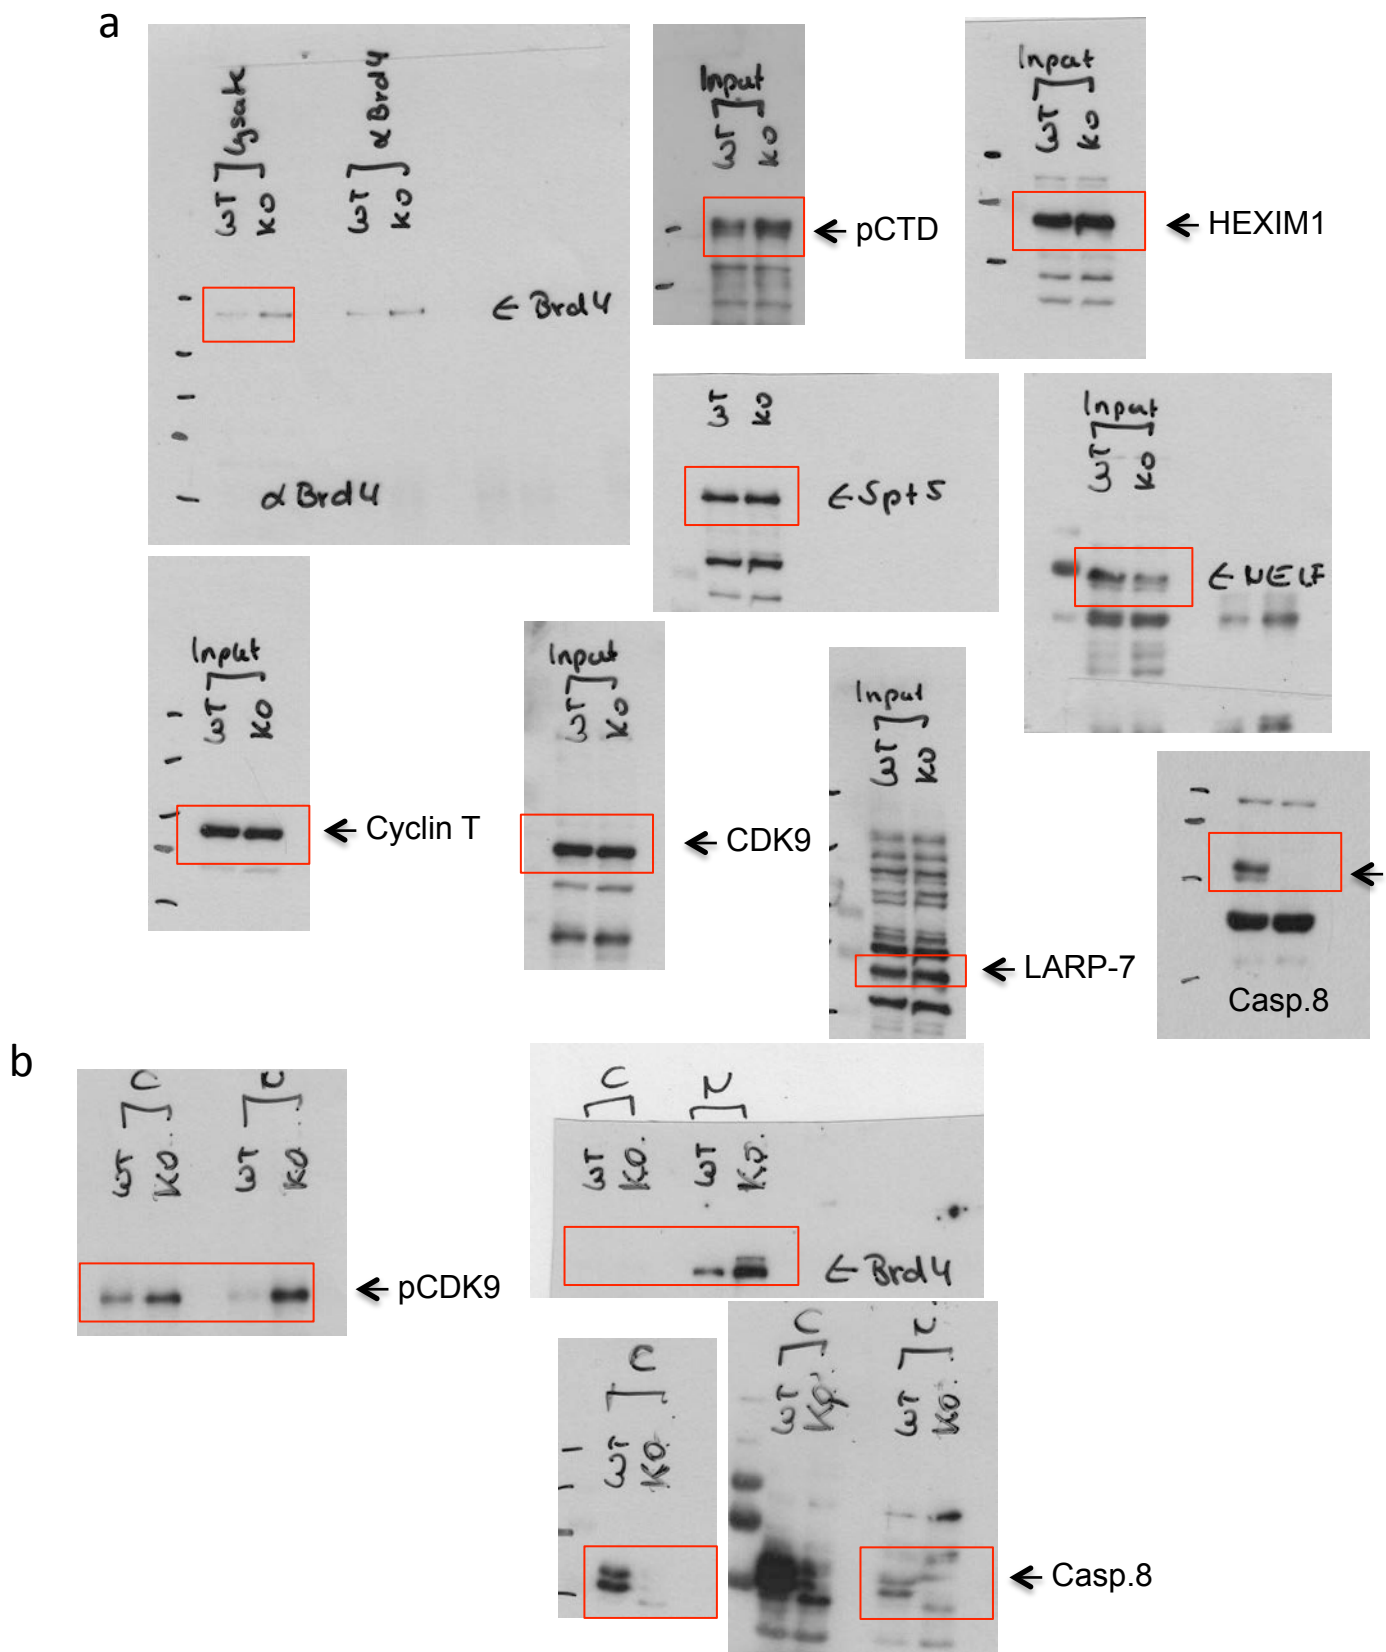

Figure S3

C

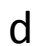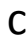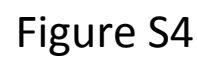

Figure S6

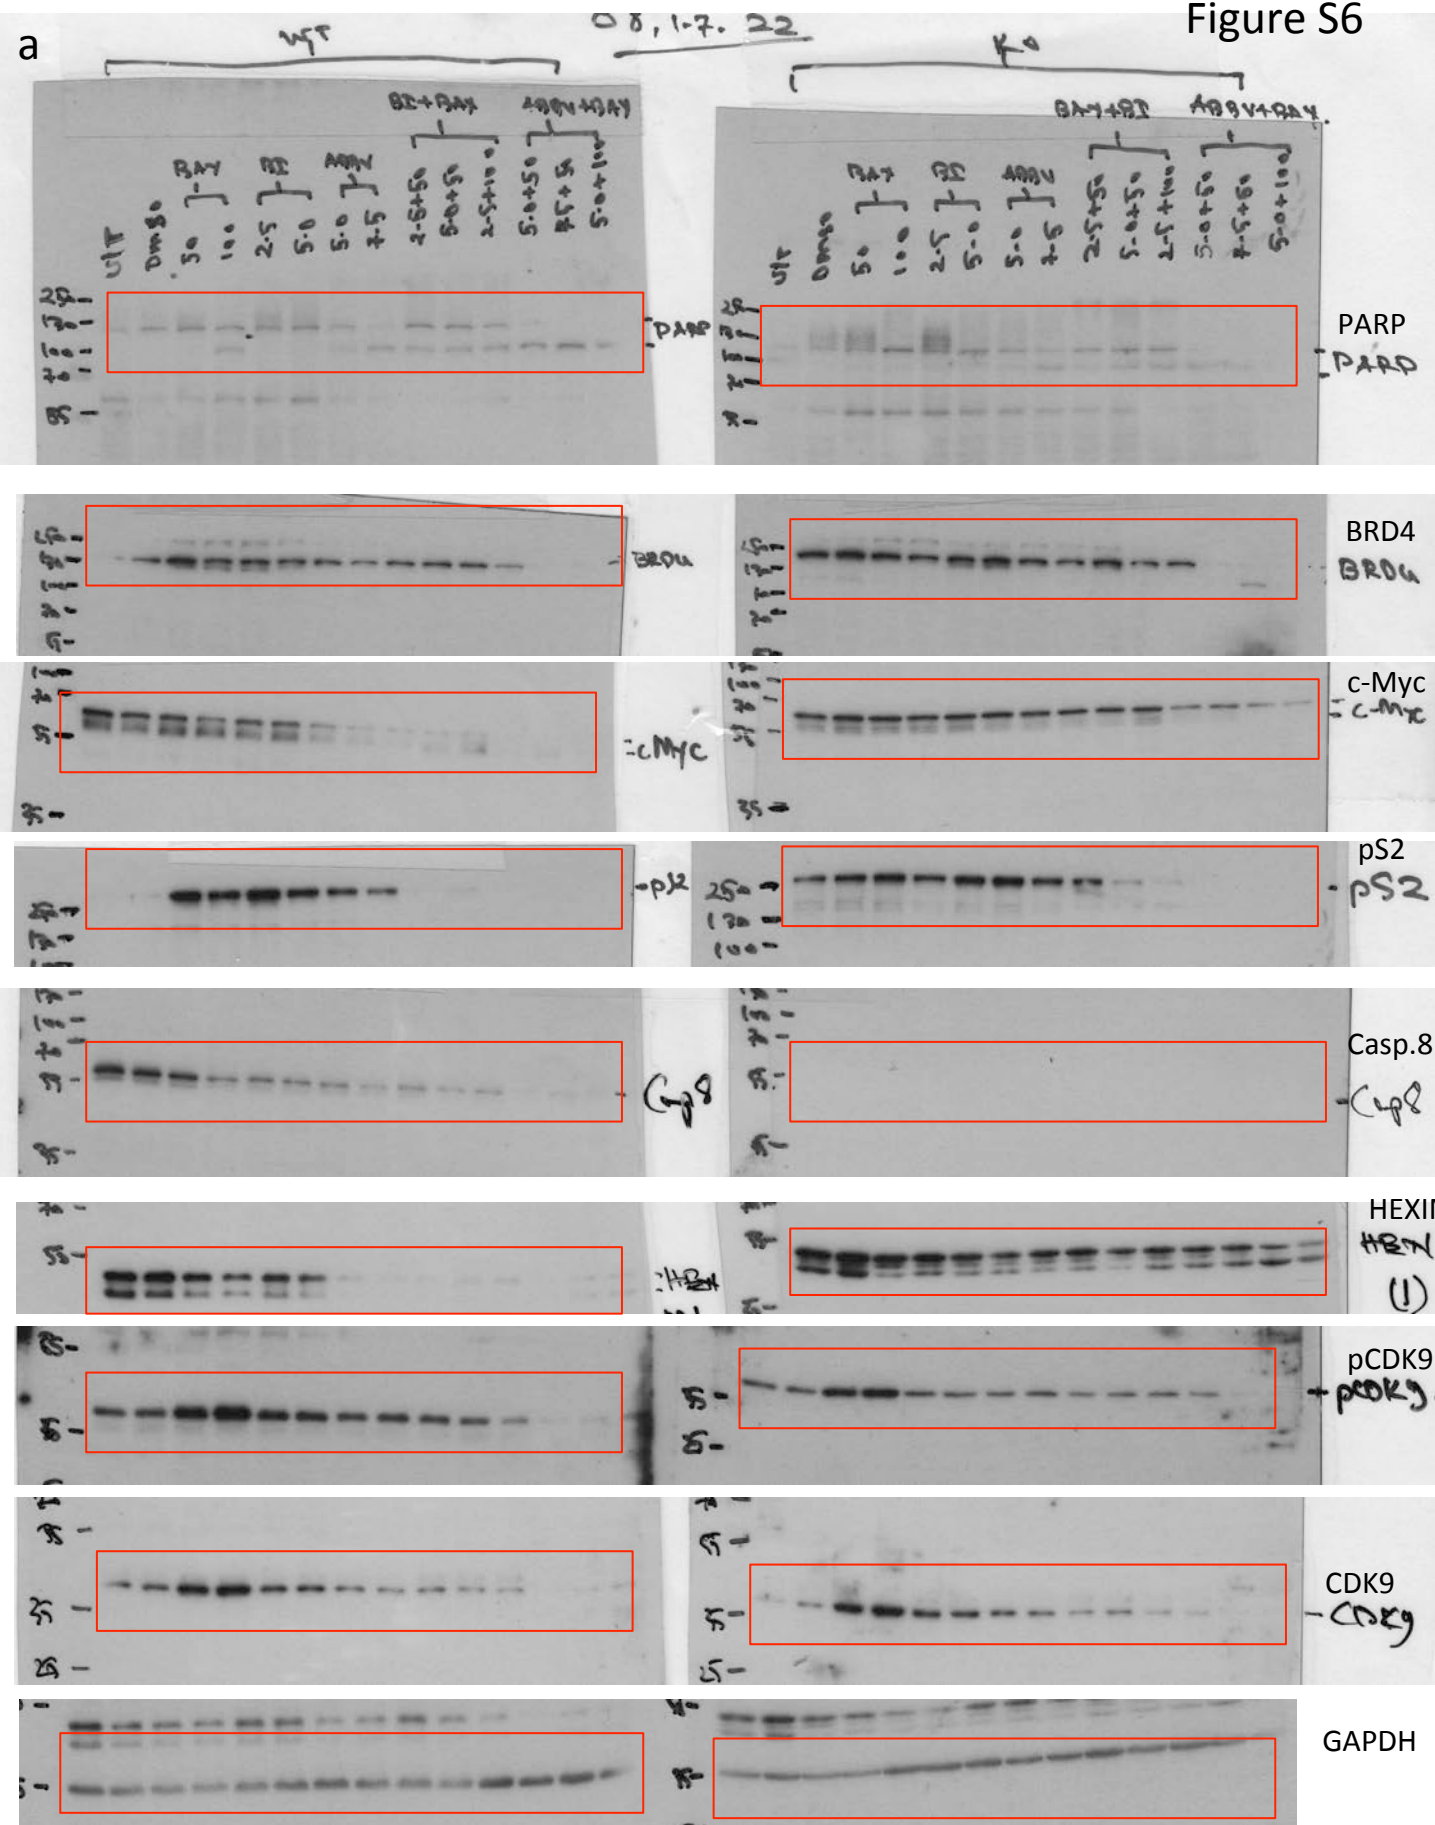

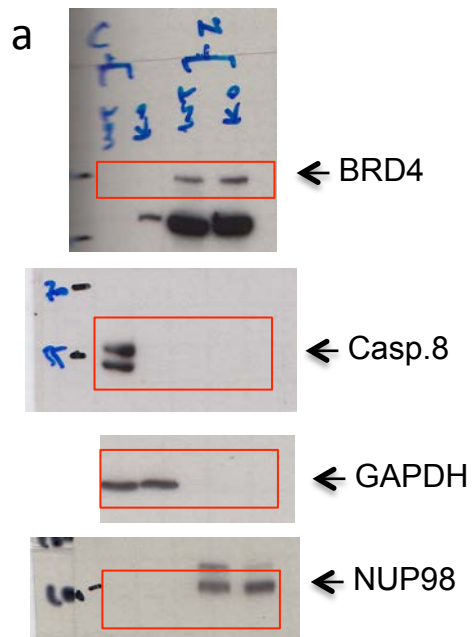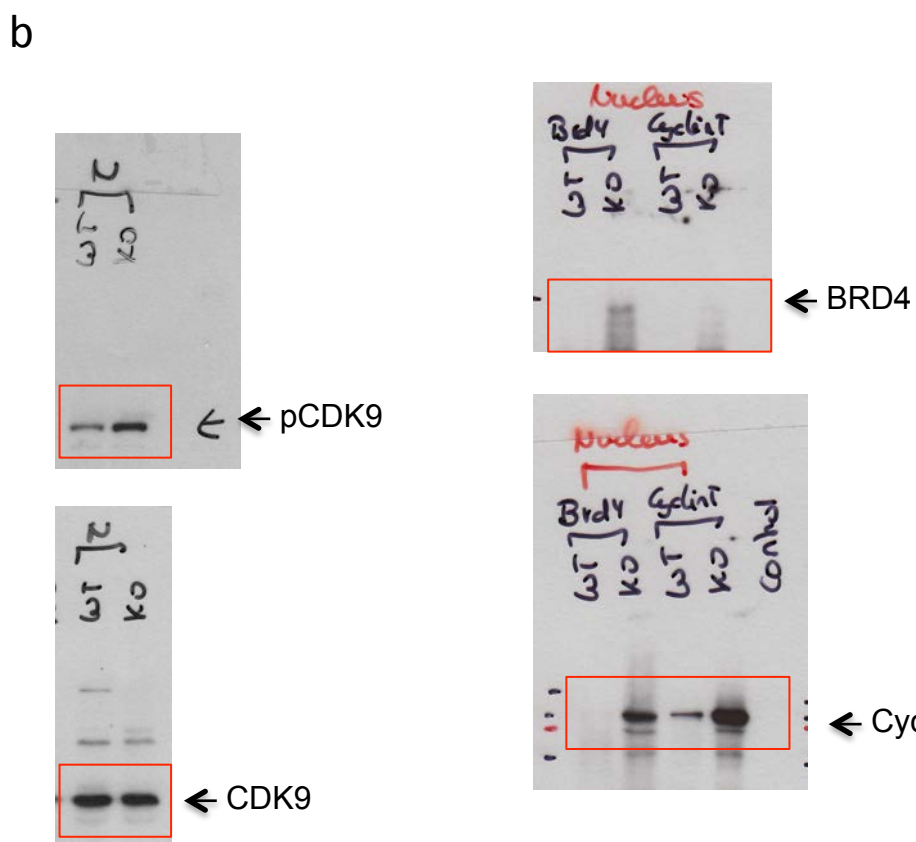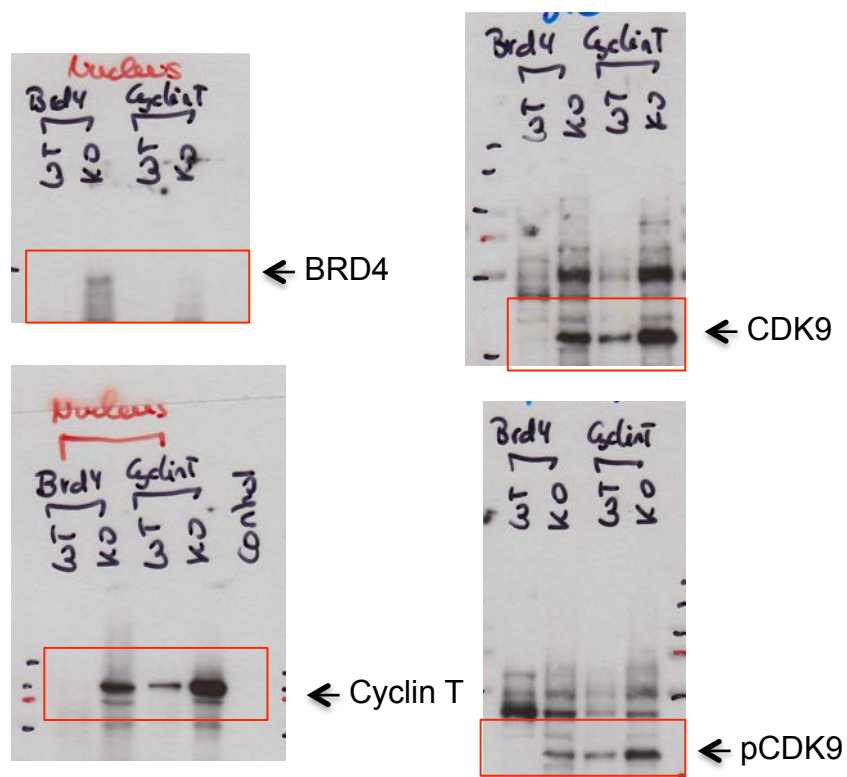

Supplementary Figure S2



a

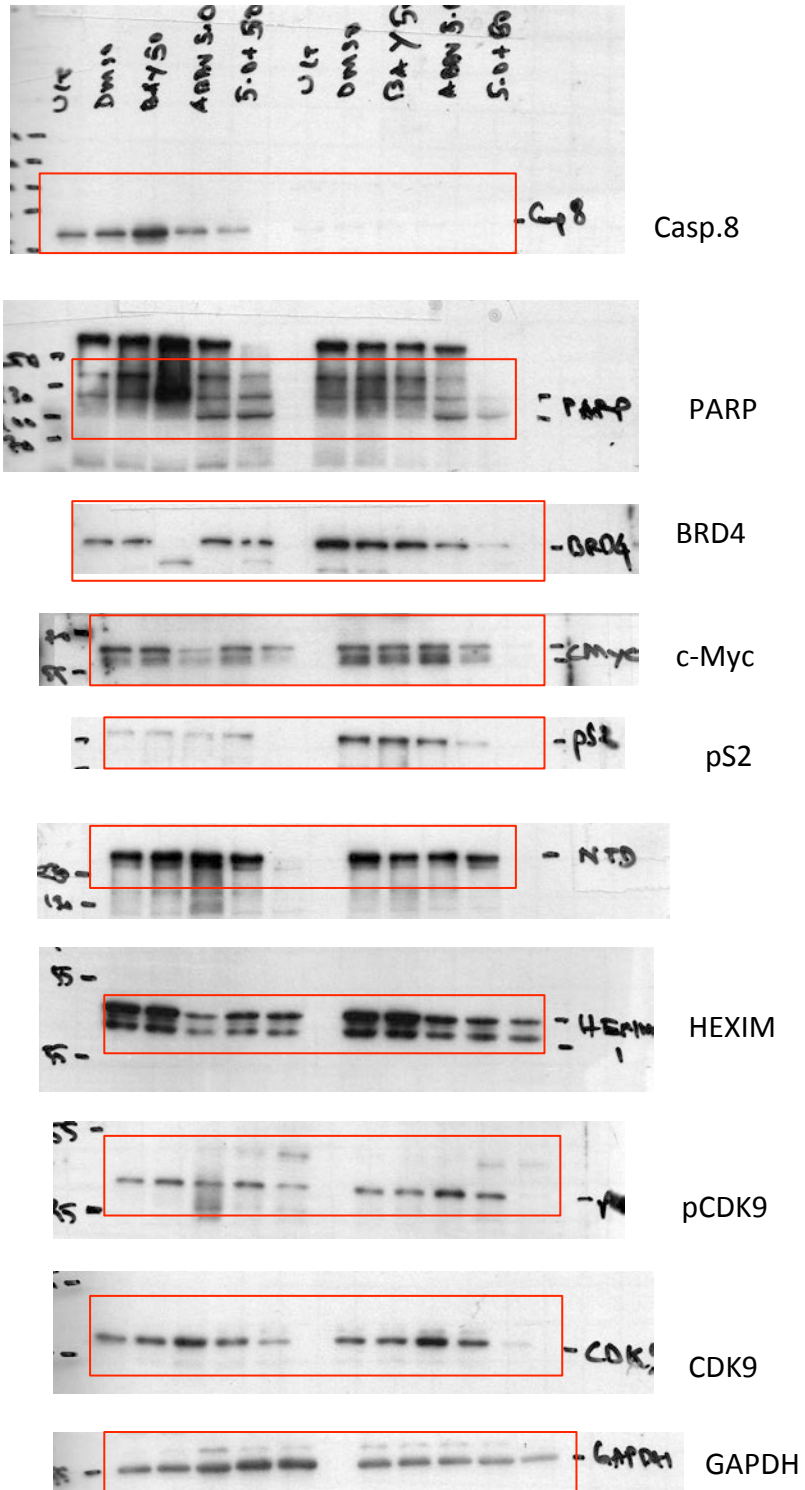

Supplementary Figure S3

Supplement: s1 [file s1]
